# Supplementary material
Source: publisher site journal article supplement (https://www.dovepress.com/article/288108)
Supplement: Supplementary file 1 [file get_supplementary_file.php]

**Additional file 1: Supplementary Table S1** Data collection: physician-rated assessments and patient-reported outcomes.

**Supplementary Table S1**

Data collection: physician-rated assessments and patient-reported outcomes.

|                              | Physician-rated assessments (objective evaluation index) |                                                                                                                                                                                                                            | Patient-reported outcomes (subjective evaluation index) |                                                                                                                                                                                                                                           |
|------------------------------|----------------------------------------------------------|----------------------------------------------------------------------------------------------------------------------------------------------------------------------------------------------------------------------------|---------------------------------------------------------|-------------------------------------------------------------------------------------------------------------------------------------------------------------------------------------------------------------------------------------------|
|                              | Assessment                                               | Details and scoring                                                                                                                                                                                                        | Assessment                                              | Details and scoring                                                                                                                                                                                                                       |
| <b>Depressive symptoms</b>   | MADRS <sup>1</sup>                                       | Assesses severity of depressive symptoms using 10 items rated from 0 (normal findings or absence of symptoms) to 6 (severe depressive symptoms); total score of 0–60 with a higher score indicating more severe depression |                                                         |                                                                                                                                                                                                                                           |
| <b>Cognitive function</b>    | DSST <sup>2,3</sup>                                      | Assesses psychomotor speed using digit-to-symbol matching in 120 seconds; correct answers are counted with a higher score indicating better cognitive function.                                                            | PDQ-D <sup>4</sup>                                      | Assesses perceived cognitive deficits using 20 items in four subscales, rated from 0 (never in past 7 days) to 4 (more than once a day); total score of 0 to 80 with a higher score indicating more poorly perceived cognitive impairment |
| <b>Psychosocial function</b> |                                                          |                                                                                                                                                                                                                            | SDS <sup>5</sup>                                        | Assesses disability in work, social and family life, rated from 0 (no disability) to 10 (extreme disability); total score of 0–30 with a higher score indicating a higher impairment                                                      |
|                              |                                                          |                                                                                                                                                                                                                            | WPAI <sup>6</sup>                                       | Assesses six items for work productivity and impairment in the past 7 days. Outcomes for each item are expressed as % impairment with a higher score indicating worse outcomes                                                            |
| <b>QoL</b>                   |                                                          |                                                                                                                                                                                                                            | EQ-5D-5L <sup>7</sup>                                   | Assesses health status using five items to calculate a utility index of 0 (death) to 1 (perfect health). Visual-analogue scores range from 0 (worst health state) to 100 (best health state)                                              |

**Abbreviations:** DSST, Digital Symbol Substitution Test; EQ-5D-5L, European Quality of Life -5 Dimensions Questionnaire 5-Level; MADRS, Montgomery-Asberg Depression Rating Scale; MDD, major depressive disorder; PDQ-D, Perceived Deficit Questionnaire-Depression; QoL, quality of life; SDS, Sheehan Disability Scale; WPAI, Work Productivity and Activity Impairment.

## Supplementary references

1. Montgomery SA, Asberg M. A new depression scale designed to be sensitive to change. *Br J Psychiatry*. 1979;134:382–389.
2. Wechsler D. *Wechsler Adult Intelligence Scale*. Third ed. San Antonio, Texas: Psychological Corporation; 1997.
3. Wechsler D. *Wechsler Adult Intelligence Scale*. Third ed. Tokyo, Japan: Nihon Bunka Kagakusha Co. Ltd; 2006.
4. Lam RW, Lamy FX, Danchenko N, et al. Psychometric validation of the Perceived Deficits Questionnaire-Depression (PDQ-D) instrument in US and UK respondents with major depressive disorder. *Neuropsychiatr Dis Treat*. 2018;14:2861–2877.
5. Sheehan DV, Harnett-Sheehan K, Raj BA. The measurement of disability. *Int Clin Psychopharmacol*. 1996;11 Suppl 3:89–95.
6. Reilly MC, Zbrozek AS, Dukes EM. The validity and reproducibility of a work productivity and activity impairment instrument. *Pharmacoeconomics*. 1993;4(5):353–365.
7. Herdman M, Gudex C, Lloyd A, et al. Development and preliminary testing of the new five-level version of EQ-5D (EQ-5D-5L). *Qual Life Res*. 2011;20(10):1727–1736.
